1

## Managing Marek's disease in the egg industry

2

Carly Rozins<sup>1,2</sup>, Troy Day<sup>2</sup>, Scott Greenhalgh<sup>2,3</sup>

3

1. Department of Integrative Biology,  
University of California, Berkeley,  
Valley Life Sciences Building, Berkeley, CA 94720  
Phone: (510) 642-3281, Fax: (510) 643-6264  
crozins@berkeley.edu

8

9

2. Department of Mathematics and Statistics,  
Queen's University, Jeffery Hall, Kingston, ON, K7L 3N6, Canada.  
Phone: (613) 533-2390, Fax: (613) 533-2964

10

11

12

13

3. Department of Mathematics,  
Siena College, Latham, NY, 12211, USA.  
Phone (518) 783-2583, Fax: (518) 783-2986

14

15

16

17

18

19

20

21  
22  
23  
24  
25  
26  
27  
28  
29  
30  
31  
32  
33  
34  
35  
36  
37  
38  
39  
40  
41  
42  
43

## Abstract

The industrialization of farming has had an enormous impact. To most, this impact is viewed solely in the context of productivity, but the denser living conditions and shorter rearing periods of industrial livestock farms provide pathogens with an ideal opportunity to spread and evolve. For example, the industrialization of poultry farms drove the Marek’s disease virus (MDV) to evolve from causing a mild paralytic syndrome to causing a highly contagious, globally prevalent, disease that can have up to a 100% mortality rate. Fortunately, the economic catastrophe that would occur from MDV evolution has been prevented through widespread use of live imperfect vaccines that limit disease symptoms, but fail to prevent transmission. Unfortunately, the continued rollout of such imperfect vaccines is steering the evolution of MDV towards an even greater virulence and an ability to evade vaccine protection. Thus, there is a need to investigate alternative economically viable control measures for their ability to inhibit MDV spread and evolution. In what follows we examine the economic viability of standard husbandry practices for their ability to inhibit the spread of both virulent MDV and very virulent MDV throughout an industrialized egg farm. To do this, we parameterized a dynamic MDV transmission model and calculate the loss in egg production due to disease. We find that the MDV strain as well as the cohort duration had the greatest influence on disease burden and hence egg production. Additionally, we find that the standard husbandry practice involving conventional cages, often referred to as “battery cages”, results in the least per capita loss in egg production due to MDV infection when compared to alternative enriched or aviary (free-run) systems for virulent MDV, but not very virulent MDV, in which case the Aviary system performs the best. These results highlight an important cost that managers will face when implementing new hen husbandry practices.

44 **Key words:** Poultry, disease outbreaks, egg production, industrial farms, husbandry practices

45

46

47

## 1. Introduction

48 The industrialization of farming empowers farmers to keep pace with the ever-increasing demands of  
49 consumers, but it also creates a situation highly conducive to pathogen evolution as a result of cramped  
50 living conditions and shorter rearing periods (ANTHONY, 1998). A primary example of this is Marek's  
51 disease virus (MDV), which causes Marek's disease (MD), a disease of poultry that has evolved from a  
52 relatively harmless paralytic syndrome into a highly virulent pathogen (Witter, 1997) as a result of  
53 industrialization (Atkins et al., 2013a; Rozins and Day, n.d.). To make matters worse, MDV is highly  
54 contagious, globally prevalent (Dunn and Gimeno, 2013), causes up to 100% mortality (Read et al., 2015;  
55 Witter, 1997), and imposes a colossal economic burden (Morrow and Fehler, 2004).

56 The economic burden of MD comes from both direct losses from hen mortality and morbidity (e.g., egg  
57 production loss), and indirect losses caused by industry wide use of vaccines and control measures.

58 While indirect losses are substantial, the control of MDV starting in 1969 through a succession of live  
59 vaccines has saved billions of dollars and helped to ensure the present economic stability of the industry  
60 (Churchill, AE and Payne, LN and Chubb, 1969; Churchill et al., 1969). Unfortunately, current vaccines for  
61 MDV have major drawbacks in that they only limit disease symptoms and permit both infection and  
62 transmission. Such drawbacks enable virulent MDV strains to go undetected and are attributed with  
63 being a major factor in the continued evolution of MDV virulence (Read et al., 2015), including its  
64 potential to evade vaccine induced immunity (Nair, 2005).

65 Detection and eradication of MDV is extraordinarily difficult. MDV spreads through freely circulating  
66 viral particles (Biggs P. M., 1967) that are shed through the feather follicles of infected laying-hens. As

67 infected laying-hens are likely symptom free due to vaccination, and cohort sizes range from 30,000-  
68 100,000 hens (Holt et al., 2011), the identification and removal of MDV infected hens is difficult.  
69 Additionally it has been shown that MDV is often reintroduced to barns as often as once per month  
70 (Kennedy et al., 2018). Thus, other measures are needed to prevent or limit MDV infection.

71 Here, we evaluate the most common management scenarios in the egg industry for their ability to  
72 prevent MDV infection, while also mitigating any egg production loss. Specifically, we investigate how  
73 animal husbandry practices such as the density of laying-hens (reflecting alternative caging systems), the  
74 cohort duration, and the MDV strain influence MDV incidence, mortality, and egg production. Using data  
75 on MDV infection, in addition to data on the demographics of typical laying-hens in the egg industry, we  
76 evaluate the influence of management scenarios on MDV incidence, mortality, and egg production. We  
77 use a mathematical model (Rozins and Day, 2016) calibrated to reflect ongoing industrial practices,  
78 namely those of Aviary, Conventional, and Enriched systems. We assess the effect of MD on egg  
79 production over a 10-year horizon to evaluate any effect of management scenario and MDV infection on  
80 egg production.

81

## 82 **2. Materials and Methods**

83 To quantify the impact of management scenario on mitigating the effects of MDV infection on egg  
84 production, we use a mathematical model for MDV transmission in industrial poultry farms of laying-  
85 hens (Rozins and Day, 2016). As the vast majority of laying-hens are vaccinated (Payne, 1985), our model  
86 assumes full vaccination coverage with the current gold standard vaccine Rispen CVI988 (Ralapanawe et  
87 al., 2016a). We also assume two distinct mechanisms of MDV transmission: 1) transmission within a  
88 cohort of laying hens (those sharing a barn), and 2) transmission between consecutive cohorts of laying-  
89 hens occupying a barn (i.e. transmission through residual viral particles left in the barn).

90

91 **2.1 Management Scenarios.** We evaluate 72 different management scenarios. These scenarios describe  
92 the typical egg industry, matching flock sizes to the stocking densities of Aviary (30000 laying-hens),  
93 Conventional (80000 laying-hens), and Enriched (50000 laying-hens) systems, and 12 different cohort  
94 durations that capture the most common molting practices (no molt (NM), one molt (OM) at 69 weeks,  
95 and two molts (TM), one at 69 weeks and another at 104 weeks) (Bell, 2003). Molting is a natural  
96 process in which hens lose and regrow their feathers and briefly stop laying eggs. The process  
97 rejuvenates laying-hen production for additional cycles. We also consider a very virulent MDV strain  
98 (vvMDV) (pathotype FT158) and a virulent MDV strain (vMDV) (pathotype MPF57). For each scenario,  
99 we estimate the probability of a MDV epidemic, the flock mortality, and the average egg production  
100 over a 10-year horizon (Table S7, Fig.2, Fig. 3).

101

102 **2.2 Egg production.** To evaluate the impact of MD on egg production over a 10-year horizon, we base  
103 uninfected laying-hen egg production on a study of 25 million White Leghorns laying-hens (Figure 1)  
104 (Bell, 2003). MDV infected laying-hens incur a 5% egg production loss ( $R$ ), which is an expected  
105 consequence of MDV infection (Purchase, 1985). Both uninfected and infected laying-hens' egg  
106 production is continuously discounted by the annual US 2016 inflation rate of 1.25%. Further details of  
107 parameters, including sources, are available in Table 1.

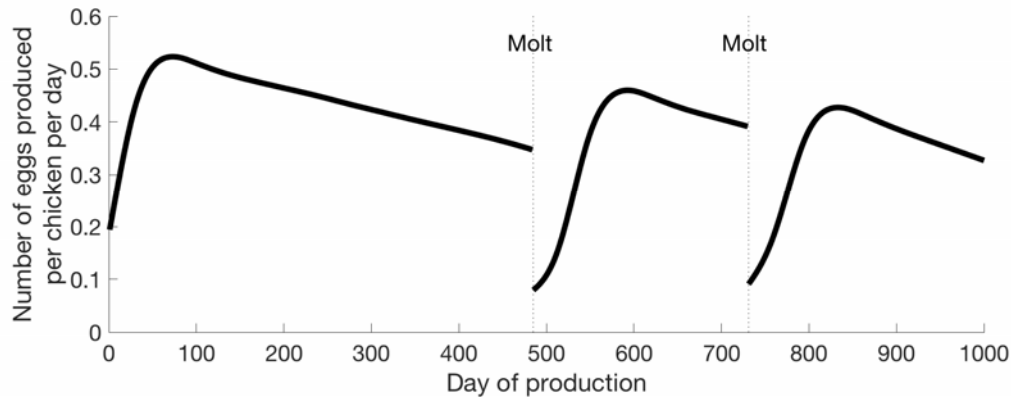

108

109 Figure 1. Mean daily egg production per hen over a 1000-day period. In this scenario, the hen is molted  
110 twice, once after 69 weeks (438 days) and again at 104 weeks (728 days). Molting rejuvenates the egg  
111 laying process, but has diminishing effects over time, and is done at most twice.

112

113 **2.3 MDV transmission with-in a cohort.** To describe MDV transmission within a cohort of laying-hens,  
114 we parameterize a compartmental model (Rozins and Day, 2016) to capture MDV prevalence levels in  
115 concurrent vaccinated flocks of laying-hens occupying a barn. We consider two classes of laying-hens:  
116 those susceptible to MDV infection ( $S$ ), and those infected with MDV ( $I$ ). The rate at which susceptible  
117 laying-hens become infected is governed by a constant transmission rate ( $\sigma$ ), and the density of viral  
118 particles ( $F$ ) in the barn. Infected laying-hens experience disease related mortality at rate ( $v$ ), and shed  
119 viral particles at the rate ( $\kappa$ ). Finally, viral particles are removed, either through decay or the ventilation  
120 system, at rate ( $\delta$ ). Overall, the system of differential equations that models MDV transmission with-in a  
121 cohort is:

$$\begin{aligned}\frac{dS}{dt} &= -\sigma FS \\ \frac{dI}{dt} &= \sigma FS - vI\end{aligned}\tag{1}$$

$$\frac{dF}{dt} = \frac{\kappa}{V}I - \delta F$$

122 where  $V$  is the volume of the barn. Note, implicit in the definition of system (1) is the assumption that  
123 the per capita contact rate between susceptible laying-hens and viral particles is density dependant.

124 **2.4 MDV transmission between cohorts.** After a cohort duration of  $T$  days, the barn is emptied,  
125 cleaned, and restocked with the next cohort of new susceptible laying-hens. The emptying, cleaning, and  
126 restocking period is modelled as instantaneous, as the time to accomplish this is small relative to the  
127 duration of egg production. Thus, the laying-hens and density of viral particles *after* the farm is emptied,  
128 cleaned, and restocked is given by the difference equation:

$$\begin{aligned}\Delta S(t_n) &= N, \\ \Delta I(t_n) &= 0, \\ \Delta F(t_n) &= -(1 - a)F(t_n),\end{aligned}\tag{2}$$

129 Where  $N$  is the flock size,  $a$  is the proportion of viral particles that remain after the barn is emptied,  
130 cleaned, and restocked,  $t_n = nT$  and  $n$  is an indexing for the cohort.

131 By combining the between cohort equations (2) and the within cohort equations (1), we have a model to  
132 describe the continual chain of transmission of MDV in cohorts of laying-hens over a 10-year horizon.

133

134 **2.5 Parameter values.** All model parameters were extracted from available data (Atkins et al., 2013a,  
135 2011a; Cui et al., 2016; Kennedy et al., 2018; Ralapanawe et al., 2016b, 2016a; Zhang et al., 2015).  
136 Parameters associated to barn characteristics were obtained from communication with Burnbrae  
137 Farms in Ontario Canada, or the literature. We assume dust shed by MDV infected laying-hens contain  
138 viral particles proportional to the virulence level of the MDV strain (Ralapanawe et al., 2016a). To obtain  
139 the viral shedding rate, we took Atkins et al. (2011) model of daily dander shedding for a typical broiler

140 bird and parameterized it according to a recent study on dust shed from MDV infected layer chickens  
141 vaccinated with Rispen CVI988 (Atkins et al., 2011a; Ralapanawe et al., 2016b, 2016a). Thereby, we  
142 obtain the viral shedding rates  $\kappa$  for each MDV strain from data on the dust shed from a typical laying-  
143 hen (Table S4), and the viral copy number (VCN) of MDV per milligram of dust for vMDV (pathotype  
144 MPF57) and vvMDV (pathotype FT158) (Table S3), and over each cohort duration (older chickens will  
145 shed more viral particles) (Table S5) (Bell, 2003; Witter et al., 1968). Data on the virulence level of the  
146 MDV pathotype and mortality, in addition to the standard assumption of Exponentially distributed  
147 parameters that is typical of compartmental models (Greenhalgh and Day, 2017; Hethcote and Tudor,  
148 1980), was used to estimate MDV mortality rates ( $\nu$ ) for each MDV strain (Ralapanawe et al., 2016a).  
149 We base the viral particle removal rate ( $\delta$ ) on the barn ventilation system and estimates of the decay  
150 rate of the viral particles (Kennedy et al., 2018). Therefore,  $\delta$  is taken as the sum of the decay rate and  
151 the average air exchange rate of a typical barn (Table 1, Webappendix). In practice, the air exchange  
152 rate of a barn is based on its stocking density, as more densely stocked barns require a greater exchange  
153 of air compared to less densely stocked barns. For simplicity, we consider a constant air exchange rate,  
154 which we estimate using available data and standard fitting techniques. Finally, we determine the  
155 transmission rate  $\sigma_v$  using both an estimate, and the mathematical formulation of the MDV effective  
156 reproductive number (Atkins et al., 2013, 2012; Renz, 2008) (Webappendix), yielding

$$\sigma_v = \frac{\nu \delta V R_e}{N \kappa},$$

157 where  $\kappa$ ,  $\delta$ ,  $\nu$ , are previously estimated (Table 1, Table S4, Table S5).

158

159

160 **2.6 Sensitivity analysis.** To quantify the contribution of each model parameter to the variability of the  
161 outcomes measured, we calculated 95% confidence intervals and first-order sensitivity indices.



162 Specifically, first-order sensitivity indices attribute the variation in model outputs to uncertainty in  
 163 model inputs.  
 164

| Parameter                                                        | Symbol     | Value(s)                             | Distribution/Parameter range                                                         | Reference                                                         |
|------------------------------------------------------------------|------------|--------------------------------------|--------------------------------------------------------------------------------------|-------------------------------------------------------------------|
| Flock size <sup>1</sup> (x10,000) (laying-hens)                  | $N$        | 3, 5, 8                              |                                                                                      | Pers. comm. (2016) <sup>3</sup>                                   |
| Transmission rate (per VCN/m <sup>3</sup> per day)               | $\sigma_v$ | $\frac{Vv\delta R_e}{N\kappa}$       |                                                                                      | estimated (See Webappendix)                                       |
| MDV mortality rate (day <sup>-1</sup> )                          | $v$        |                                      |                                                                                      | (Ralapanawe et al., 2016b)                                        |
| vMDV                                                             |            | 0.00054                              | Exp(0.00054)                                                                         |                                                                   |
| vvMDV                                                            |            | 0.0041                               | Exp(0.0041)                                                                          |                                                                   |
| vMDV shedding rate <sup>2</sup> (log <sub>10</sub> VCN per day)  | $\kappa$   |                                      | Tri( 9.721, 9.847, 9.905)<br>Tri(10.004,10.019, 10.033)<br>Tri(10.004,10.020,10.033) | (Atkins et al., 2013a; Ralapanawe et al., 2016b), See Webappendix |
| NM                                                               |            |                                      |                                                                                      |                                                                   |
| OM                                                               |            |                                      |                                                                                      |                                                                   |
| TM                                                               |            |                                      |                                                                                      |                                                                   |
| vvMDV shedding rate <sup>2</sup> (log <sub>10</sub> VCN per day) |            |                                      | Tri(9.940,10.041,10.090)<br>Tri(10.173,10.186,10.197)<br>Tri(10.173,10.186,10.197)   |                                                                   |
| NM                                                               |            |                                      |                                                                                      |                                                                   |
| OM                                                               |            |                                      |                                                                                      |                                                                   |
| TM                                                               |            |                                      |                                                                                      |                                                                   |
| Viral particle removal rate per hen (day <sup>-1</sup> )         | $\delta$   | 0.1<br>+ (2.61<br>$\times 10^{-8})N$ |                                                                                      | Pers. comm. (2016) <sup>2</sup>                                   |
| Reduction in egg production due to MDV infection (%)             | $R$        | 0.05                                 | $U(0.015,0.05)$                                                                      | (Purchase, 1985)                                                  |
| Egg Price (USD/dozen)                                            |            |                                      |                                                                                      | (National Egg Market Summary, 2018)                               |
| Large caged                                                      |            | 1.40                                 |                                                                                      |                                                                   |
| Large cage free                                                  |            | 1.60                                 |                                                                                      |                                                                   |
| Cohort duration (weeks)                                          | $T$        |                                      | 50-145                                                                               |                                                                   |
| Cleaning coefficient                                             | $a$        | 0.1                                  | $U(0.00,0.10)$                                                                       | (Kennedy et al., 2018)                                            |
| Barn volume (m <sup>3</sup> )                                    | $V$        | 6000                                 |                                                                                      | Pers. comm. (2016) <sup>2</sup>                                   |
| Effective Reproductive number                                    | $R_e$      | 4.71                                 |                                                                                      | See Webappendix                                                   |

165 Table 1. Model parameter values.

166 <sup>1</sup>Flock sizes are selected to achieve stocking densities that reflect those found in Aviary, Conventional,  
167 Enriched systems. <sup>2</sup>Personal Communications refer to the Director of Poultry Operations (John  
168 Heuthorst), and the Farm Manager (Fred Lozo) at Burnbrae Farms, Ontario, Canada.

169

170

### 3. Results

171 We found that the strain of MDV circulating within the barn has the most significant impact on egg  
172 production. Additionally, the cohort duration (the time hens spend laying eggs) has an impact of egg  
173 production, with longer cohorts suffering greater losses. But perhaps most interestingly we found that  
174 barns with the greatest stocking densities suffered the least per capita loss in production when vMDV  
175 circulated within the barn, but when the more virulent vvMDV was circulating, the Aviary system (the  
176 least densely stocked barn) had the least per capita loss in egg production.

177

178 **3.1 Disease.** Our findings show that, once established, the majority of a flock will become infected,  
179 regardless of management scenario. We also found that disease spread was very rapid, infecting the  
180 majority of a flock well before the end of the cohort. Mortality due to MDV infection varied significantly  
181 across management scenarios and was largely dependent on the cohort duration and the MDV strain  
182 virulence level (Fig 2b, Fig 2c). The less virulent strain of MDV would often fail to become established  
183 within the barn (it was eliminated by the end of the first cohort), or would become eliminated before  
184 the end of the 10-year study period due to between-cohort cleaning (Fig 2a). The more virulent strain  
185 was more successful at becoming established within the barn (Fig 2a).

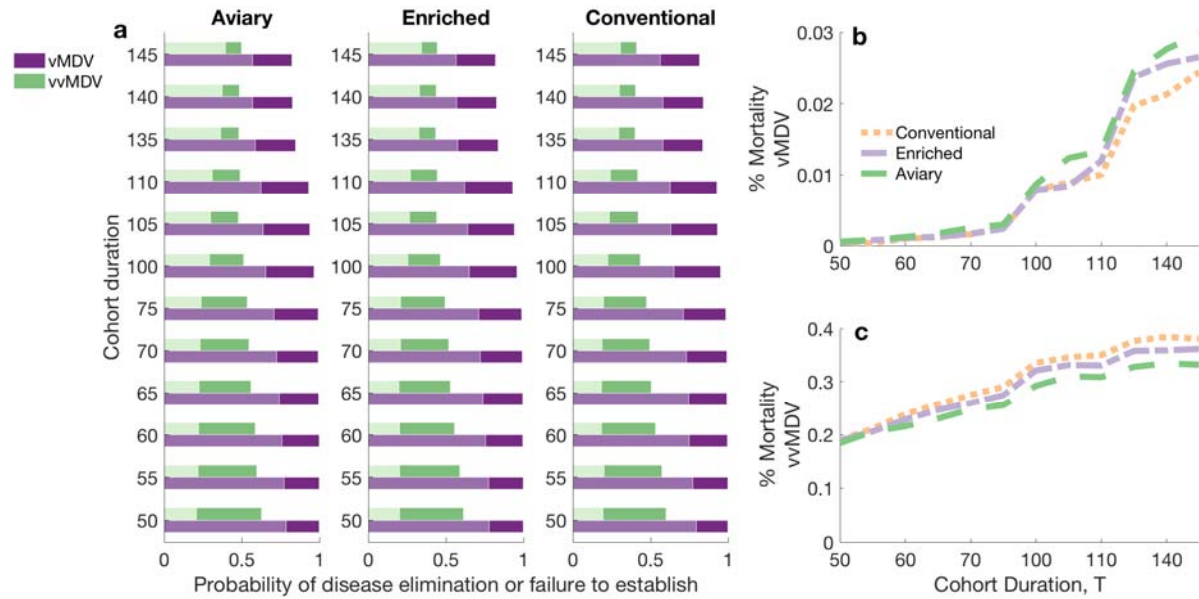

186  
187

188 Figure 2. Likelihood of MDV elimination, or failure to become established after introduction, within a 10-  
189 year period, and MDV mortality. (a) Likelihood MDV is eliminated within 10 years for particular cohort  
190 duration, MDV strain, and system. In purple is the probability of disease elimination for a barn seeded  
191 with vMDV and in green for a barn seeded with vvMDV. The light shading (light purple or light green)  
192 indicates the proportion of time disease is eliminated by the end of the first cohort (after cleaning),  
193 otherwise the disease is eliminated over multiple cohorts. Mean mortality (mean proportion of the flock  
194 that die due to MDV) for each cohort duration due to (b) vMDV and (c) vvMDV for Aviary, Conventional,  
195 and Enriched system stocking densities.

196

197 **3.2 Cohort duration and molting.** Longer cohort durations experience higher mortality and greater per  
198 capita egg production loss due to MDV infection (Table S7 and Fig 2). This was greatest for the more  
199 virulent strain of MD (vvMDV). For example, laying-hens in a conventional system over a 65-week cohort  
200 duration (zero molts) had a mean mortality rate of 23% and produced on average 17.63 fewer eggs per  
201 hen when vvMDV was established. This egg production loss amounts to a \$2 USD loss per bird, but in a

202 conventional barn with 80,000 hens amounts to 10.15 million eggs and approximately \$1.3 million (2018  
 203 USD) over 10-years. Under the same setup, if laying-hens are kept for an additional 40 weeks  
 204 (undergoing one molt) the loss more than doubles to 39 eggs per hen, or \$2.7 million over 10-years.

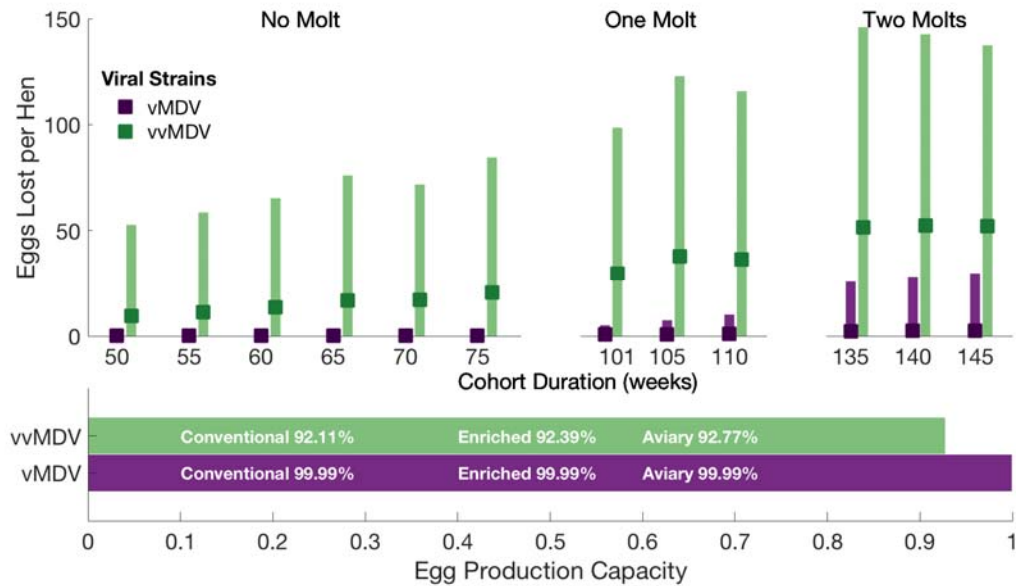

205  
 206 Figure 1. (Top) Average eggs lost per hen with 95% credible intervals for all cohort durations and molting  
 207 practices (no molts, one molt, and two molts) and (Bottom) Egg production capacity for a 60-week  
 208 cohort, measured as (eggs produced/total possible eggs producible in the absence of disease) for each  
 209 MDV strain and Aviary, Conventional, and Enriched system stocking densities.

210

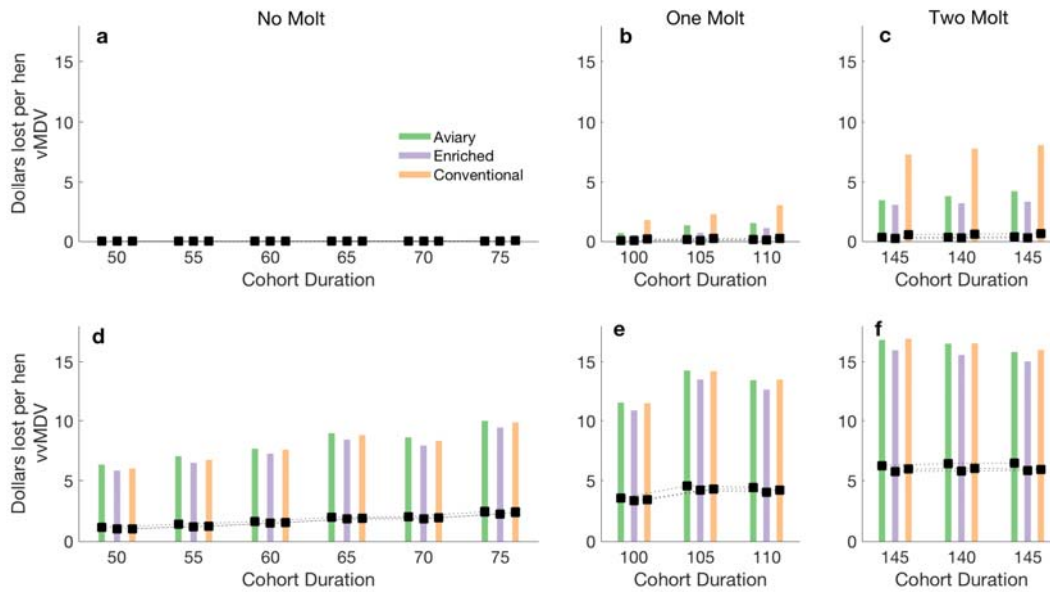

211

212 Figure 2. Economic loss (USD), due to mortality, and reduction in egg production due to MD. Results are  
 213 scaled by stocking density and future egg-earnings are discounted using the 2016 US inflation rate of  
 214 1.25%. To calculate the total loss in USD, we first calculate the total revenue possible for a scenario  
 215 (Table 1) and then subtract the total revenue when MDV is introduced. Finally, to normalize across  
 216 stocking densities, we divide by the total number of laying-hens. Plots a-c) examine the vMDV strain,  
 217 and plots d-f) examine the vvMDV strain. Plots a) and d) reflect a barn that does not molt its hens (no  
 218 molting), plots b) and e) a single molting and plots c) and f) two moltings. The bars represent the 95%  
 219 credible interval while the points represent the mean.

220

221 **3.3 Stocking Density.** Aviary, Conventional, and Enriched systems had similar per capita egg production  
 222 losses. However, switching from a Conventional system to an Aviary or Enriched system yielded a small  
 223 per capita egg production loss of less than one egg per hen when the less virulent strain on MD (vMDV)  
 224 was circulating (Table S7). However, for the more deadly strain of the virus (vvMDV), switching from a  
 225 Conventional system to an Aviary system yielded a mean per capita gain of approximately two eggs per

226 hen on average and a switch to an Enriched system yielded a mean gain of approximately one egg per  
227 hen (Table S7). Note that the overall losses were greatest for the Conventional system (more hens more  
228 losses) when we accounted for hen numbers, the per capita loss in the conventional system was always  
229 less than that in the Aviary system for vvMDV but not vMDV.

230

231 **3.4 MDV Strain.** The circulating MDV strain had the greatest effect on laying-hen survival and egg  
232 production (Fig. 2b, Fig. 2c, Fig. 3, Table S7). The vvMDV strain caused at least twice the per capita egg  
233 production loss of the vMDV strain (Fig. 3). For both MDV strains, the per capita egg production loss  
234 increased as cohort duration increased (Fig. 2).

235 **3.5 Sensitivity Analysis.** To quantify the contribution of parameters to the variability in predicted egg  
236 production, we calculated variance-based first-order sensitivity indices (Sobol, 2001) (Table S6). First-  
237 order sensitivity indices indicate how uncertainty in a particular parameter contributes to the variability  
238 of model outcomes. Details of the probability distributions used in the calculation of first-order  
239 sensitivity indices are available in Table S6. Predictions in egg production were most sensitive to the  
240 MDV mortality rate  $\nu$  and the reduction in egg production due to MDV infection  $R$  (Table S6). Sensitivity  
241 to MDV mortality increased with cohort size and cohort duration, while the opposite relation was  
242 observed for the reduction in egg production due to MDV infection (Table S6).

243

#### 4. Discussion

244 This study is the first to evaluate the burden of MDV on the most common management scenarios in the  
245 egg industry using mathematical models. Additionally, the mathematical model developed is also the  
246 first calibrated to the Rispens CVI988 vaccine (Rispens et al., 1972), the current gold standard vaccine in  
247 the poultry industry. Given these firsts, we evaluated the effects of two MDV strains on laying-hen

248 production in Aviary, Conventional, and Enriched systems, including the typical laying-hen cohort  
249 durations for a 6000 m<sup>3</sup> barn. For each scenario, we estimated MDV prevalence, the potential for  
250 disease elimination, and the egg production loss (measured per capita) due to MDV infection.

251  
252 While theory suggests less densely stocked barns should make disease elimination easier [13], we  
253 observed MDV infection persisting for all stocking density scenarios. In all scenarios, if the outbreak  
254 persisted, disease spread was rapid, with the majority of hens infected by the end of a cohort. The high  
255 prevalence is consistent with other modelling studies of MDV transmission within broiler farms that  
256 featured significantly shorter cohorts durations (Atkins et al., 2013b; Kennedy et al., 2018). The lower  
257 laying-hen numbers in Aviary systems carry an additional disadvantage, as lower stocking densities and  
258 more open designs render flocks more prone to hen cannibalism (Ahammed et al., 2014). It also leads to  
259 higher per capita egg production losses from MDV infection for the less virulent strain of the disease  
260 (vMDV) and a larger per capita financial loss in production for all but the shortest cohorts used in this  
261 study. However, the Aviary system had the least per capita loss in egg production when the more  
262 virulent strain (vMDV) was circulating within the barn. Additionally, lower laying-hen numbers should  
263 make barn cleaning easier, as there are fewer hens to shed viral particles, and thus fewer accumulated  
264 viral particles at the end of a cohort to clean, implying a greater likelihood of interrupting transmission  
265 of MD between cohorts.

266 Financially, the more densely stocked Conventional and Enriched systems performed the best. This is  
267 due to a number of factors. The caged eggs produced in the Conventional and Enriched systems are of  
268 less value than the free-run eggs of the Aviary system. Therefore, even when the Aviary system had a  
269 lower per capita loss in production, the overall per capita financial loss in the Aviary system was always  
270 greatest. Additionally, for shorter cohorts there is a diluting effect for the more densely stocked barns,  
271 as there are more hens to infect, which takes slightly longer in these barns. Therefore, by the end of the

272 cohort a smaller proportion of hens, in the more densely stocked barn, have become infected or dies  
273 due to disease. Finally, the higher air exchange rate, which occurs at higher stocking density, removes  
274 infected MDV particles at faster rate. Combining this result with lower hen cannibalism rates, a 13%-36%  
275 lower upkeep cost (Matthews and Sumner, 2015), and the fact that higher stocking densities have been  
276 shown to select for less virulent strains of MDV (Rozins and Day, n.d.), show that Enriched and  
277 Conventional systems have substantial utility in the fight against MDV. However, since MD spreads  
278 rapidly throughout a barn, Conventional systems can have up to 80,000 hens shedding viral particles  
279 accumulating within the barn throughout the laying period. Therefore, if eradicating MDV from a barn is  
280 the objective (rather than managing symptoms through vaccination), then a barn using a Conventional  
281 system may require more cleaning than a barn stocking fewer hens.

282

283 Mathematical models inevitably involve simplifying assumptions. For instance, our model treated all  
284 eggs produced as equal value and quality. This assumption understates the productivity of longer  
285 cohort durations, as older hens produce larger eggs that are often worth more. Furthermore, we did not  
286 account for the increased cost associated to the 47% more hens required over a ten-year period for  
287 husbandry practices that avoid molts (Bell, 2003). We also did not account for multiple factors that may  
288 affect MDV persistence, such as transmission from direct contact of laying-hens in open environments,  
289 the effects of litter floors, which is a known factor affecting hen welfare and disease transmission  
290 (Dawkins et al., 2004; Lay Jr et al., 2011), seasonally-varying ventilation rates, or potential breaches in  
291 biosecurity. Incorporating such additional modes of transmission would likely strengthen the utility of  
292 Conventional systems, as multiple modes of transmission would make elimination more difficult. In  
293 addition, we do not account for the effects of disease coinfection, although with additional  
294 compartmentalization we could develop co-infection models with various other diseases. Additionally,  
295 all parameter values used in this model were constant with respect to time. Previous modelling efforts



296 of MDV transmission in the broiler industry (Atkins et al., 2013a, 2013b; Kennedy et al., 2018) have  
297 assumed parameters such as transmission and the viral shedding change over time. We believe many of  
298 the parameter values, had we modelled them as functions of time, would asymptote quickly, and since  
299 the lifespan of a layer hen is much longer than that of a broiler bird, it is unlikely that assuming constant  
300 parameter value has a significant impact of the overall results of the model. Finally, while  
301 parameterizing our model we used information derived from studies on broiler birds (Atkins et al.,  
302 2011b) when information was not available for laying hens, and we are unsure of the consequences, if  
303 any, this has on our results. With this in mind, the methods used to construct our impulsive  
304 compartmental model could also easily be applied to study other avian diseases, such as the highly  
305 pathogenic H7 avian influenza recently found in a Tennessee commercial flock (Karlsons, Donna and  
306 Cole, 2017), as the impulse feature of the model naturally describes the all-in-all-out dynamics of poultry  
307 farms.

308

309 For the scenarios our model considered, our results illustrate that the Conventional and Enriched  
310 systems are best for mitigating per capita losses when the less virulent strain, vMDV, is circulating, but  
311 the Aviary system does best for mitigating per capita egg loss when the more virulent strain, vvMDV, is  
312 circulating within the barn. This is likely due to the higher stocking densities which requires additional  
313 time for the same proportion of the flock to become infected. This leads to higher production for the  
314 slower spreading vMDV strains. Additionally, the higher ventilation rates of the Conventional and  
315 Enriched systems help to delay the onset of the MD outbreak in a cohort. However, due to the  
316 additional cost of free-run eggs, the Aviary barn suffers the highest per capita financial loss in egg  
317 production for all scenarios and both viral strains explored.

318 **Conclusion**

319 With the fear that prolonged use of Rispens CVI988 is masking the emergence of extremely virulent  
320 MDV strains (USAHA, 2015) and so enhancing current husbandry practices to combat MDV is of the  
321 utmost importance. Our results show that natural disease elimination through regular management  
322 practices is unrealistic for the more virulent vvMDV. Our results also suggests that increasing stocking  
323 densities helps to reduce per capita egg production loss due to MD in the short term (for the less  
324 virulent strains) and helps to mitigate long-term virulence evolution (Rozins and Day, n.d.). While at first  
325 these results may seem surprising, they call to light that improving long-term hen welfare is not as  
326 simple as solely reducing stocking densities or cohort durations, and that the improvement of hen  
327 welfare is not necessarily distinct from the goals of economics.

328

329

### 330 **Author's Contributions**

331 SG and CR came up with the study design and they parameterized the model. All authors participated in  
332 the drafting and editing of the paper.

333

### 334 **Funding**

335 This work has been funded by the Egg Farmers of Canada. The Egg Farmers of Canada had no  
336 involvement in the study design, interpretation of the results, preparation of the article, nor did they  
337 have any decision in where to submit the article.

338

### 339 **References**

- 340 Ahammed, M., Chae, B.J., Lohakare, J., Keohavong, B., Lee, M.H., Lee, S.J., Kim, D.M., Lee, J.Y., Ohh, S.J.,  
341 2014. Comparison of Aviary, Barn and Conventional Cage Raising of Chickens on Laying  
342 Performance and Egg Quality. *Asian-Australasian J. Anim. Sci.* 27, 1196–1203.  
343 <https://doi.org/10.5713/ajas.2013.13394>
- 344 ANTHONY, N.B., 1998. A REVIEW OF GENETIC PRACTICES IN POULTRY: EFFORTS TO IMPROVE MEAT  
345 QUALITY. *J. Muscle Foods* 9, 25–33. <https://doi.org/10.1111/j.1745-4573.1998.tb00641.x>
- 346 Atkins, K.E., Read, A.F., Savill, N.J., Renz, K.G., Islam, A.F., Walkden-Brown, S.W., Woolhouse, M.E.J.,  
347 2013a. VACCINATION AND REDUCED COHORT DURATION CAN DRIVE VIRULENCE EVOLUTION:  
348 MAREK'S DISEASE VIRUS AND INDUSTRIALIZED AGRICULTURE. *Evolution (N. Y.)* 67, 851–860.  
349 <https://doi.org/10.1111/j.1558-5646.2012.01803.x>
- 350 Atkins, K.E., Read, A.F., Savill, N.J., Renz, K.G., Islam, F., Walkden-brown, S.W., Woolhouse, M.E.J., 2011a.  
351 Dust shedding quantification. *BMC Vet. Res.* 7, 1–19.
- 352 Atkins, K.E., Read, A.F., Savill, N.J., Renz, K.G., Walkden-Brown, S.W., Woolhouse, M.E.J., 2011b.  
353 Modelling Marek's disease virus (MDV) infection: parameter estimates for mortality rate and  
354 infectiousness. *BMC Vet. Res.* 7, 70. <https://doi.org/10.1186/1746-6148-7-70>
- 355 Atkins, K.E., Read, A.F., Walkden-Brown, S.W., Savill, N.J., Woolhouse, M.E.J., 2013b. The effectiveness  
356 of mass vaccination on Marek's disease virus (MDV) outbreaks and detection within a broiler barn:  
357 A modeling study. *Epidemics* 5, 208–217. <https://doi.org/10.1016/j.epidem.2013.10.001>
- 358 Bell, D.D., 2003. Historical and current molting practices in the U.S. table egg industry. *Poult. Sci.* 82,  
359 965–70.
- 360 Biggs P. M., P.L.N., 1967. Studies on Marek ' s Disease . I . Experimental.
- 361 Churchill, AE and Payne, LN and Chubb, R., 1969. Immunization against Marek's disease using a live  
362 attenuated virus. *Nature* 221, 744.
- 363 Churchill, A.E., Chubb, R.C., Baxendale, W., 1969. The attenuation, with loss of oncogenicity, of the  
364 herpes-type virus of Marek's disease (strain HPRS-16) on passage in cell culture. *J. Gen. Virol.* 4,  
365 557–64. <https://doi.org/10.1099/0022-1317-4-4-557>
- 366 Cui, N., Su, S., Sun, P., Zhang, Y., Han, N., Cui, Z., 2016. Isolation and pathogenic analysis of virulent  
367 Marek's disease virus field strain in China. *Poult. Sci.* 1–8. <https://doi.org/10.3382/ps/pew073>
- 368 Dawkins, M.S., Donnelly, C.A., Jones, T.A., 2004. Chicken welfare is influenced more by housing  
369 conditions than by stocking density. *Nature* 427.
- 370 Dunn, J.R., Gimeno, I.M., 2013. Current Status of Marek's Disease in the United States and Worldwide  
371 Based on a Questionnaire Survey. *Avian Dis.* 57, 483–490. <https://doi.org/10.1637/10373-091412-ResNote.1>
- 373 Greenhalgh, S., Day, T., 2017. Time-varying and state-dependent recovery rates in epidemiological  
374 models. *Infect. Dis. Model.* <https://doi.org/10.1016/j.idm.2017.09.002>
- 375 Hethcote, H.W., Tudor, D.W., 1980. Integral equation models for endemic infectious diseases. *J. Math.*  
376 *Biol.* 9, 37–47. <https://doi.org/10.1007/BF00276034>
- 377 Holt, P.S., Davies, R.H., Dewulf, J., Gast, R.K., Huwe, J.K., Jones, D.R., Waltman, D., Willian, K.R., 2011.  
378 The impact of different housing systems on egg safety and quality. *Poult. Sci.* 90, 251–262.

- 379 <https://doi.org/10.3382/ps.2010-00794>
- 380 Karlsons, Donna and Cole, L., 2017. USDA Confirms Highly Pathogenic H7 Avian Influenza in a  
381 Commercial Flock in Lincoln County, Tennessee.
- 382 Kennedy, D.A., Dunn, P.A., Read, A.F., 2018. Modeling Marek's disease virus transmission: A framework  
383 for evaluating the impact of farming practices and evolution. *Epidemics*.  
384 <https://doi.org/10.1016/j.epidem.2018.01.001>
- 385 Lay Jr, D.C., Fulton, R.M., Hester, P.Y., Karcher, D.M., Kjaer, J.B., Mench, J.A., Mullens, B.A., Newberry,  
386 R.C., Nicol, C.J., O'Sullivan, N.P., Porter, R.E., 2011. Hen welfare in different housing systems.  
387 *Poult. Sci.* 90, 278–294. <https://doi.org/doi:10.3382/ps.2010-00962>
- 388 Matthews, W.A., Sumner, D.A., 2015. Effects of housing system on the costs of commercial egg  
389 production. *Poult. Sci.* 94, 552–557. <https://doi.org/10.3382/ps/peu011>
- 390 Morrow, C. and Fehler, F., 2004. Marek's disease, An Evolving Problem.
- 391 Nair, V., 2005. Evolution of Marek's disease -- a paradigm for incessant race between the pathogen and  
392 the host. *Vet. J.* 170, 175–83. <https://doi.org/10.1016/j.tvjl.2004.05.009>
- 393 National Egg Market Summary, 2018. . Des Moines, Iowa.
- 394 Payne, L.N. (Ed.), 1985. Marek's Disease, *Developments in Veterinary Virology*. Springer US, Boston, MA.  
395 <https://doi.org/10.1007/978-1-4613-2613-7>
- 396 Purchase, H.G., 1985. Clinical Disease and Its Economic Impact, in: Payne, L.N. (Ed.), *Marek's Disease:*  
397 *Scientific Basis and Methods of Control*. Springer, Boston, MA, pp. 17–42.
- 398 Ralapanawe, S., Walkden-Brown, S.W., Islam, A.F.M.F., Renz, K.G., 2016a. Effects of Rispens CVI988  
399 vaccination followed by challenge with Marek's disease viruses of differing virulence on the  
400 replication kinetics and shedding of the vaccine and challenge viruses. *Vet. Microbiol.* 183, 21–9.  
401 <https://doi.org/10.1016/j.vetmic.2015.11.025>
- 402 Ralapanawe, S., Walkden-Brown, S.W., Renz, K.G., Islam, A.F.M.F., 2016b. Protection provided by  
403 Rispens CVI988 vaccine against Marek's disease virus isolates of different pathotypes and early  
404 prediction of vaccine take and MD outcome. *Avian Pathol.* 45, 26–37.  
405 <https://doi.org/10.1080/03079457.2015.1110850>
- 406 Read, A.F., Baigent, S.J., Powers, C., Kgosana, L.B., Blackwell, L., Smith, L.P., Kennedy, D.A., Walkden-  
407 Brown, S.W., Nair, V.K., 2015. Imperfect Vaccination Can Enhance the Transmission of Highly  
408 Virulent Pathogens. *PLOS Biol.* 13, e1002198. <https://doi.org/10.1371/journal.pbio.1002198>
- 409 Rispens, B.H., van Vloten, H., Mastenbroek, N., Maas, H.J.L., Schat, K.A., 1972. Control of Marek's  
410 disease in the Netherlands. I. Isolation of an avirulent Marek's disease virus (strain CVI 988) and its  
411 use in laboratory vaccination trials. *Avian Dis.* 108–125.
- 412 Rozins, C., Day, T., 2016. Disease eradication on large industrial farms. *J. Math. Biol.*  
413 <https://doi.org/10.1007/s00285-016-0973-9>
- 414 Rozins, C., Day, T., n.d. The industrialization of farming may be driving virulence evolution 10.  
415 <https://doi.org/10.1111/eva.12442>
- 416 Sobol, I., 2001. Global sensitivity indices for nonlinear mathematical models and their Monte Carlo

- 417 estimates. *Math. Comput. Simul.* 55, 271–280. [https://doi.org/10.1016/S0378-4754\(00\)00270-6](https://doi.org/10.1016/S0378-4754(00)00270-6)
- 418 USAHA, 2015. Report of the Committee on Transmissible Diseases of Poultry and Other Avian Species.  
419 Providence, Rhode Island.
- 420 Witter, R.L., 1997. Increased virulence of Marek's disease virus field isolates. *Avian Dis.* 41, 149–63.
- 421 Witter, R.L., Burgoyne, G.H., Burmester, B.R., 1968. Survival of Marek's disease agent in litter and  
422 droppings. *Avian Dis.* 522–530.
- 423 Zhang, Y. ping, Li, Z. jie, Bao, K. yan, Lv, H. chao, Gao, Y. long, Gao, H. lei, Qi, X. le, Cui, H. yu, Wang, Y.  
424 qiang, Ren, X. gang, Wang, X. mei, Liu, C. jun, 2015. Pathogenic characteristics of Marek's disease  
425 virus field strains prevalent in China and the effectiveness of existing vaccines against them. *Vet.*  
426 *Microbiol.* 177, 62–68. <https://doi.org/10.1016/j.vetmic.2014.12.020>
- 427
